# Supplementary material for: Spatial and Temporal Patterns of Malaria in Phu Yen Province, Vietnam, from 2005 to 2016
Source: PubMed Central journal article supplement (PMC7543816; doi:10.4269/ajtmh.20-0392), 2020-08-03
Supplement: tpmd200392.SD1.pdf [file tpmd200392.SD1.pdf]

## Supplementary materials

Supplementary Figure 1 Time series of numbers of reported cases of malaria due to *Plasmodium falciparum* and *Plasmodium vivax*, Phu Yen, 2005-2016.

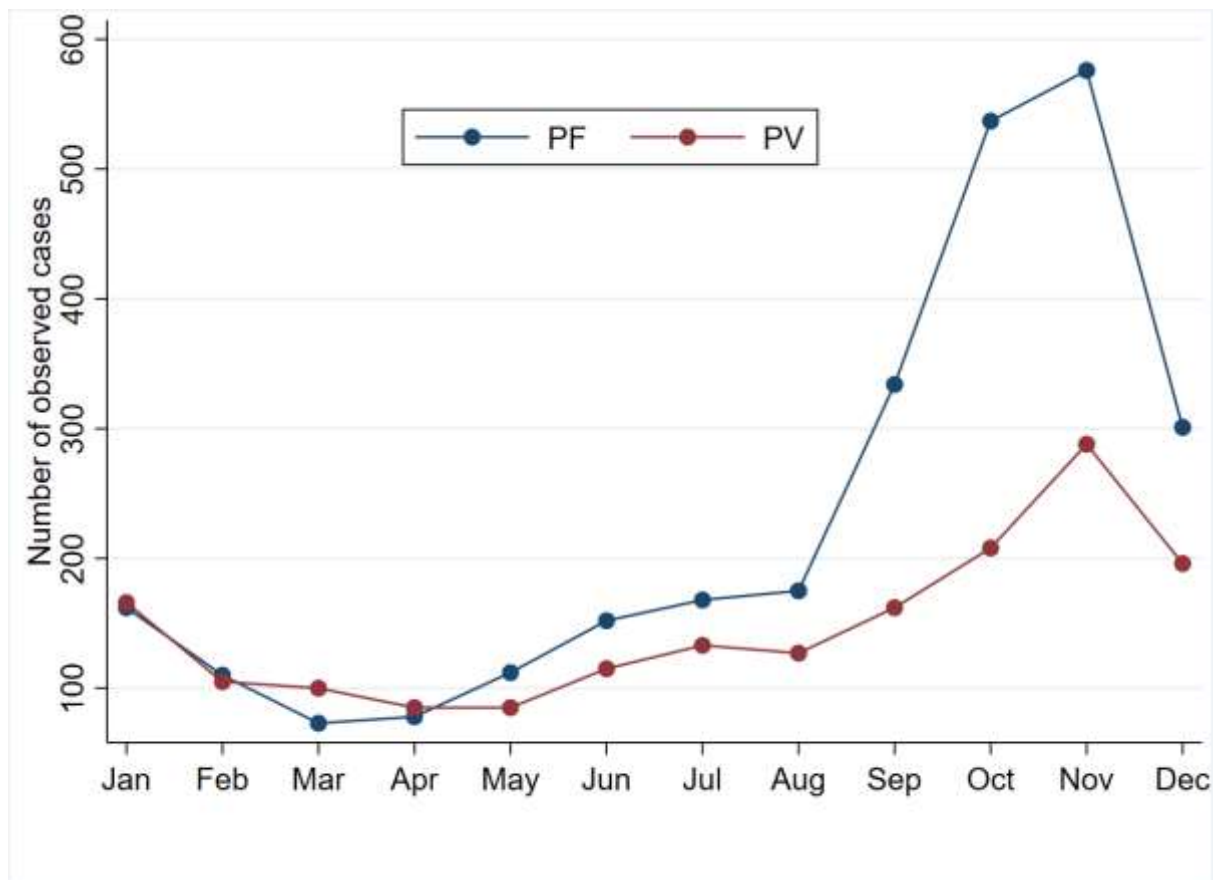

Supplementary Figure 2 Crude standardized morbidity ratios (SMR) of (a) *Plasmodium falciparum* (b) *Plasmodium vivax* by communes of Phu Yen Province, Viet Nam, 2005-2016.

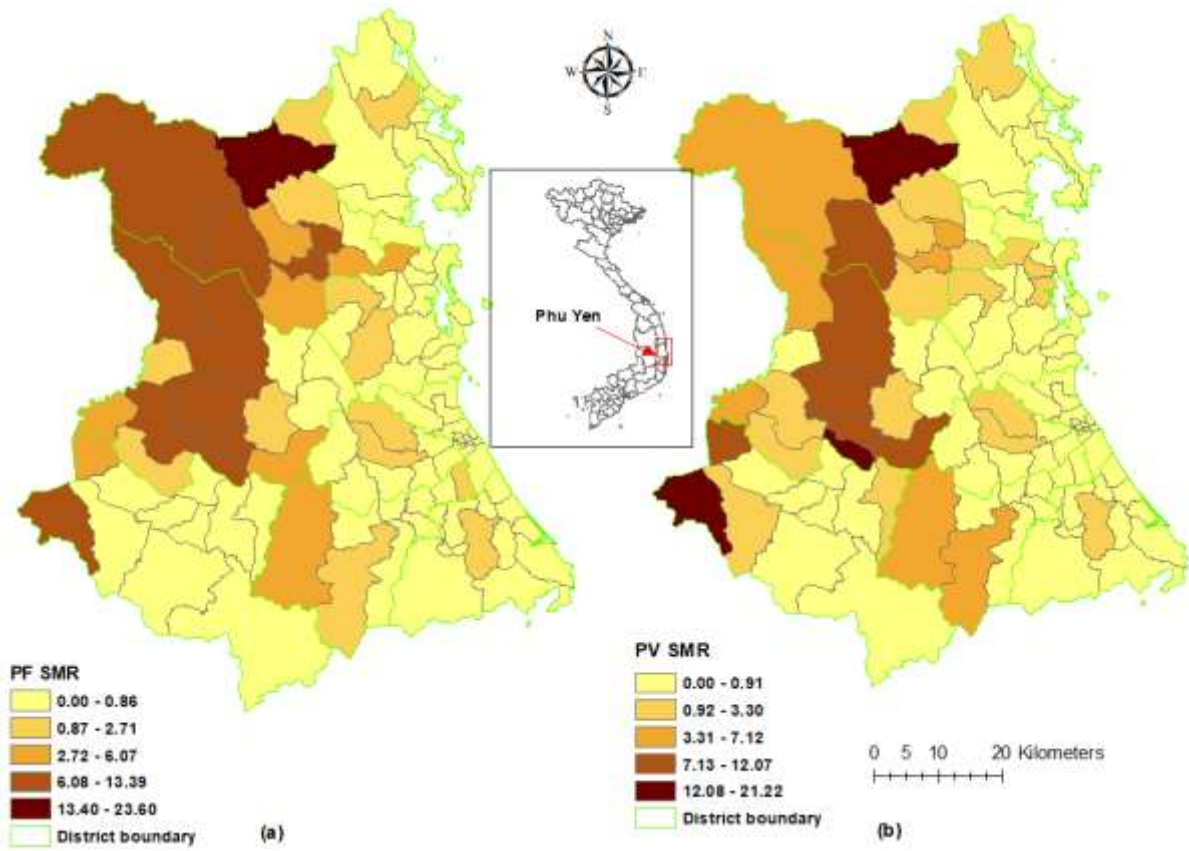

### Supplementary Figure 3 Spatial Autocorrelation Report for *Plasmodium falciparum*

**Moran's Index:** 0.209888

**z-score:** 9.296555 ■

**p-value:** 0.000000

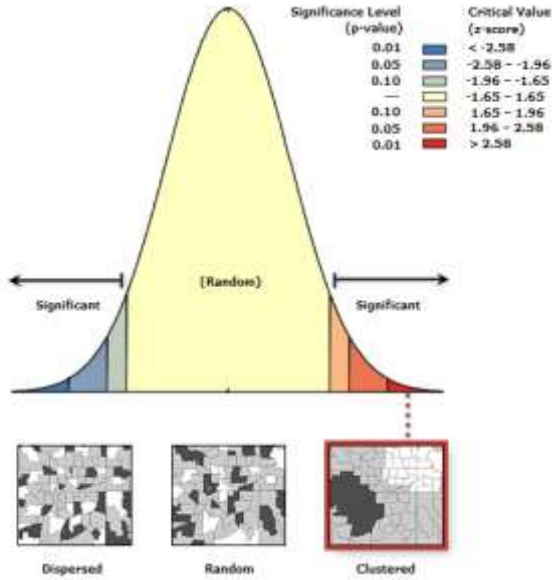

Given the z-score of 9.296555, there is a less than 1% likelihood that this clustered pattern could be the result of random chance.

#### Global Moran's I Summary

**Moran's Index:** 0.209888

**Expected Index:** -0.009709

**Variance:** 0.000558

**z-score:** 9.296555

**p-value:** 0.000000

#### Dataset Information

**Input Feature Class:** Phu\_yen\_commune

**Input Field:** PF\_CASES.CSV.INC

**Conceptualization:** INVERSE\_DISTANCE

**Distance Method:** EUCLIDEAN

**Row Standardization:** False

**Distance Threshold:** 17931.5800 Meters

**Weights Matrix File:** None

**Selection Set:** False

## Supplementary Figure 4 Spatial Autocorrelation Report for *Plasmodium vivax*

**Moran's Index:** 0.131331

**z-score:** 5.936701 ■

**p-value:** 0.000000

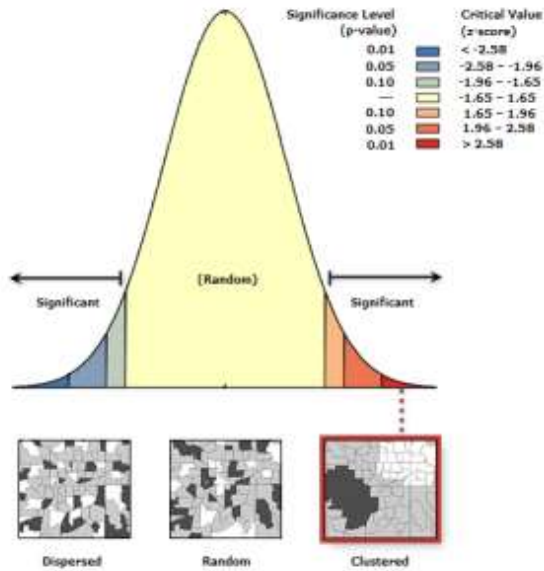

Given the z-score of 5.936701, there is a less than 1% likelihood that this clustered pattern could be the result of random chance.

### Global Moran's I Summary

**Moran's Index:** 0.1331331

**Expected Index:** -0.009709

**Variance:** 0.000564

**z-score:** 5.936701

**p-value:** 0.000000

### Dataset Information

**Input Feature Class:** Phu\_yen\_commune

**Input Field:** PV\_CASES\_NEW.CSV.INCIDENCE

**Conceptualization:** FIXED\_DISTANCE

**Distance Method:** EUCLIDEAN

**Row Standardization:** False

**Distance Threshold:** 17931.5800 Meters

**Weights Matrix File:** None

**Selection Set:** False

Supplementary Figure 5 Trend analysis of (A) *Plasmodium falciparum* and (B) *Plasmodium vivax* by communes of Phu Yen Province, Viet Nam, 2005-2016.

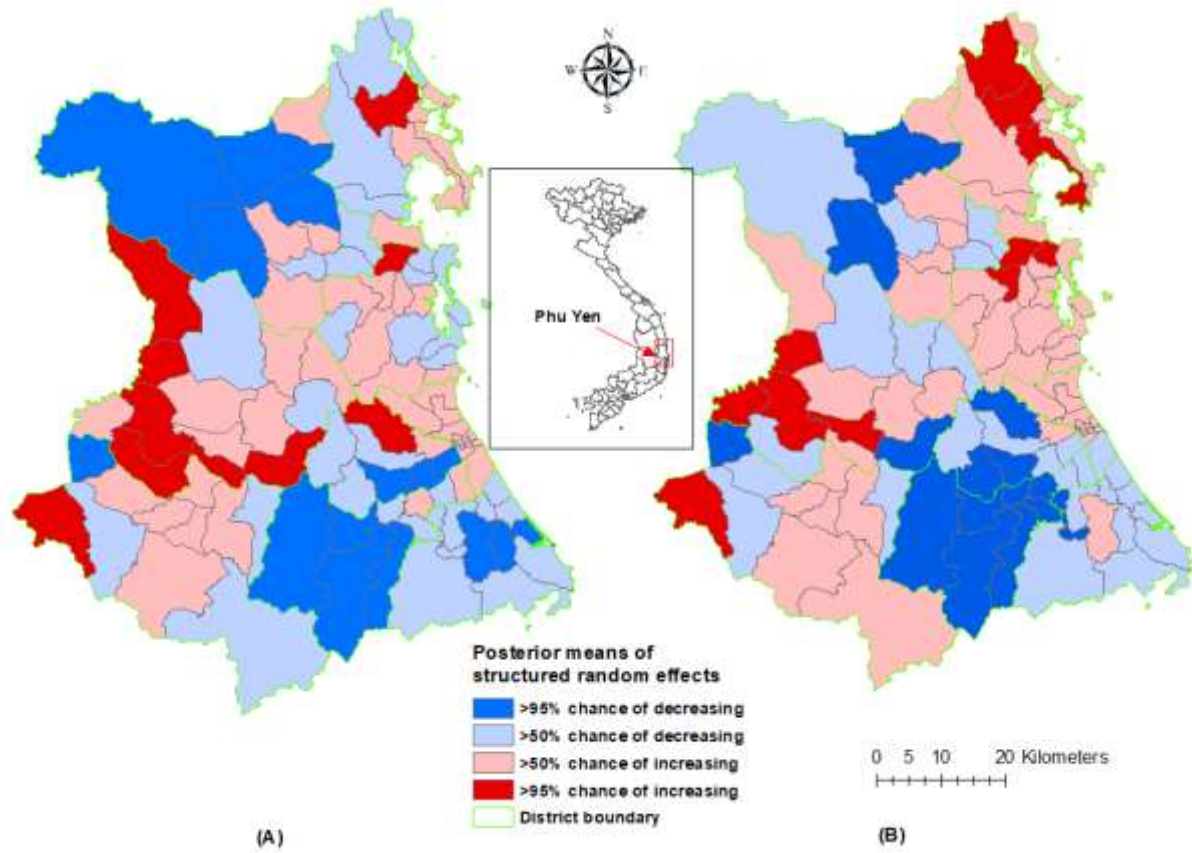

### Supplementary Table 1 Independent climatic variable selection

#### A) Climatic variables without lag.

| Variables     | IRR (95% CI)           | P value | AIC       |
|---------------|------------------------|---------|-----------|
| Precipitation | 1.004 (1.0038, 1.0044) | <0.0001 | 16579*    |
| Temp max      | 0.88 (0.868, 0.894)    | <0.0001 | 17110.58  |
| Temp min      | 0.88 (0.863, 0.894)    | <0.0001 | 17195.15* |

\* Lowest AIC, selected variable.

#### B) Climatic variables with one-month lag.

| Variables     | IRR (95% CI)          | P value | AIC      |
|---------------|-----------------------|---------|----------|
| Precipitation | 1.004 (1.0035, 1.004) | <0.0001 | 16702.47 |
| Temp max      | 0.998 (0.868, 0.894)  | 0.666   | 17387.48 |
| Temp min      | 0.99 (0.97, 1.007)    | 0.231   | 468977.7 |

#### C) Climatic variables with two-month lag.

| Variables     | IRR (95% CI)           | P value | AIC      |
|---------------|------------------------|---------|----------|
| Precipitation | 1.002 (1.0015, 1.0021) | 0.133   | 17245.36 |
| Temp max      | 1.11 (1.096, 1.131)    | <0.0001 | 17196.76 |
| Temp min      | 1.08 (1.063, 1.105)    | <0.0001 | 17321.29 |

#### D) Climatic variables with three-month lag.

| Variables     | IRR (95% CI)           | P value | AIC       |
|---------------|------------------------|---------|-----------|
| Precipitation | 0.999 (0.9991, 0.9998) | 0.002   | 17376.79  |
| Temp max      | 1.19 (1.17, 1.21)      | <0.0001 | 16915.03* |
| Temp min      | 1.132 (1.11, 1.155)    | <0.0001 | 17233.34  |

\* Lowest AIC, selected variable.

### Supplementary Table 2 Tests of collinearity in the final model

| Variables            | VIF  | 1/VIF |
|----------------------|------|-------|
| Minimum temperature  | 1.01 | 0.994 |
| Precipitation        | 1.01 | 0.995 |
| Population protected | 1.00 | 0.999 |
| Mean VIF             | 1.00 |       |

### Supplementary Table 3 Model selection

**A) Model comparison using Akaike's information criterion and Bayesian information criterion**

| <b>Models</b> | <b>Observations</b> | <b>AIC</b> | <b>BIC</b> |
|---------------|---------------------|------------|------------|
| Poisson       | 14,772              | 23540.65   | 23571.05   |
| ZIP           | 14,772              | 19573.69   | 19611.7    |

**B) Results of Vuong test**

| <b>Cases</b>                                  | <b>Coefficient</b> | <b>SE</b>     | <b>P value</b>    | <b>95% CI</b>             |
|-----------------------------------------------|--------------------|---------------|-------------------|---------------------------|
| <b>Proportion of population protected</b>     | <b>0.002</b>       | <b>0.001</b>  | <b>&lt;0.0001</b> | <b>0.0012, 0.0037</b>     |
| <b>Minimum temperature</b>                    | <b>0.003</b>       | <b>0.0001</b> | <b>&lt;0.0001</b> | <b>0.0028, 0.0033</b>     |
| <b>Precipitation</b>                          | <b>-0.150</b>      | <b>0.0095</b> | <b>&lt;0.0001</b> | <b>-0.169, -0.132</b>     |
| <b>Vuong test of ZIP vs standard Poisson:</b> |                    |               | <b>Z= 16.8</b>    | <b>Pr &gt; z = 0.0000</b> |
